# Supplementary material for: In Situ N, O Co-Doped Nanoporous Carbon Derived from Mixed Egg and Rice Waste as Green Supercapacitor
Source: MDPI journal article supplement (doi:10.3390/molecules28186543), 2023-09-09
Supplement: s1 [file s1]

## **Supplementary materials**

### **In situ N, O co-doped nanoporous carbon derived from mixed egg and rice waste as green supercapacitor**

Shumeng Qin <sup>1</sup>, Peiliang Liu <sup>1</sup>, Jieni Wang<sup>2,1</sup>, Chenxiao Liu<sup>2,1</sup>, Shuqin Zhang<sup>2,1</sup>, Yijun Tian<sup>2,1</sup>,  
Fangfang Zhang<sup>2,1</sup>, Lin Wang<sup>1</sup>, Leichang Cao<sup>2,1\*</sup>, Jinglai Zhang<sup>2</sup>, Shicheng Zhang<sup>3</sup>

<sup>1</sup> Miami College, Henan University, Kaifeng 475004, China

<sup>2</sup> College of Chemistry and Molecular Sciences, Henan University, Kaifeng 475004, China

<sup>3</sup> Shanghai Key Laboratory of Atmospheric Particle Pollution and Prevention (LAP3),  
Department of Environmental Science and Engineering, Fudan University, Shanghai, 200433,  
China

\* Corresponding Author: clch666@henu.edu.cn

**Number of Pages: 4**

**Number of Figures: 3**

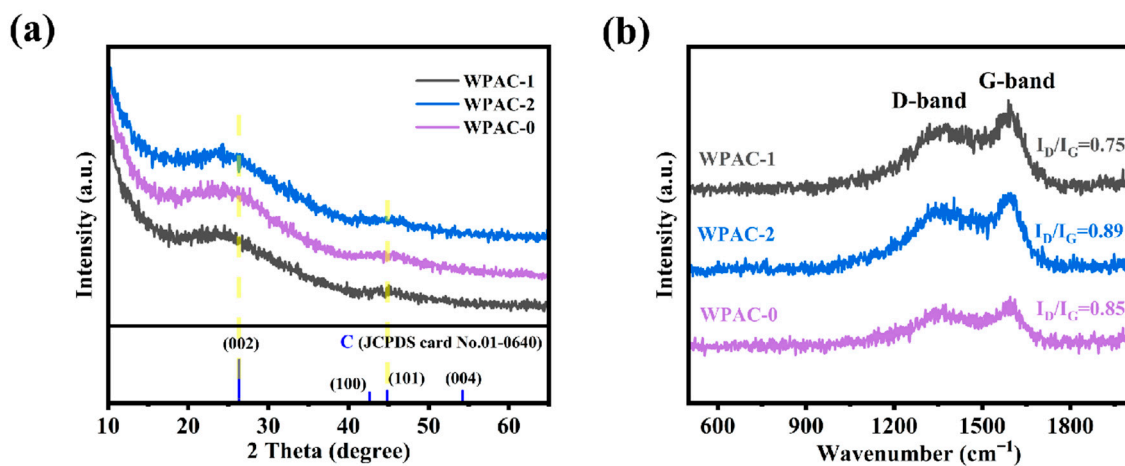

**Figure S1.** (a) XRD pattern and (b) Raman spectra of WPAC-0, WPAC-1, and WPAC-2.

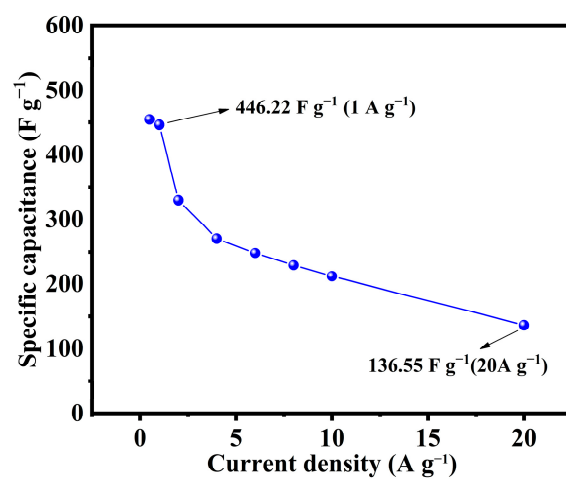

**Figure S2.** The specific capacitance of YPAC-1 at 0.5–20  $\text{A g}^{-1}$ .

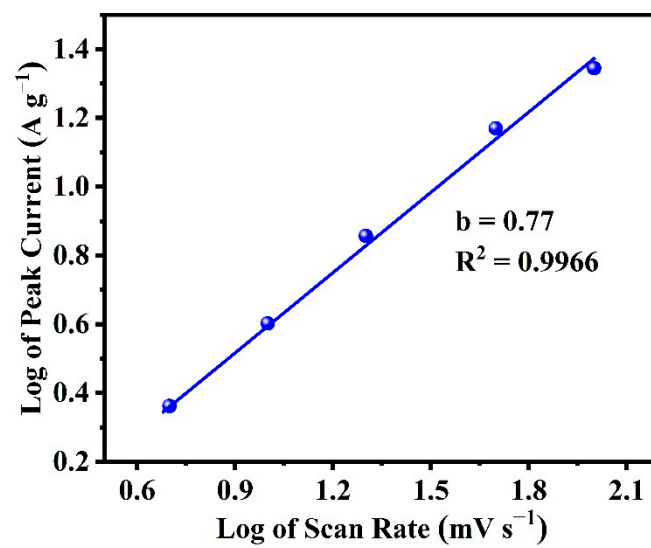

**Figure S3.** Relationship between peak current and scan rates at scan rates of 5–100 mV s<sup>-1</sup>.
